# Supplementary material for: Interaction between Polyketide Synthase and Transporter Suggests Coupled Synthesis and Export of Virulence Lipid in M. tuberculosis
Source: PubMed Central journal article supplement (PMC1238737; doi:10.1371/journal.ppat.0010002), 2005-09-30
Supplement: ppat.0010002.sg001.pdf [file ppat.0010002.sg001.pdf]

A

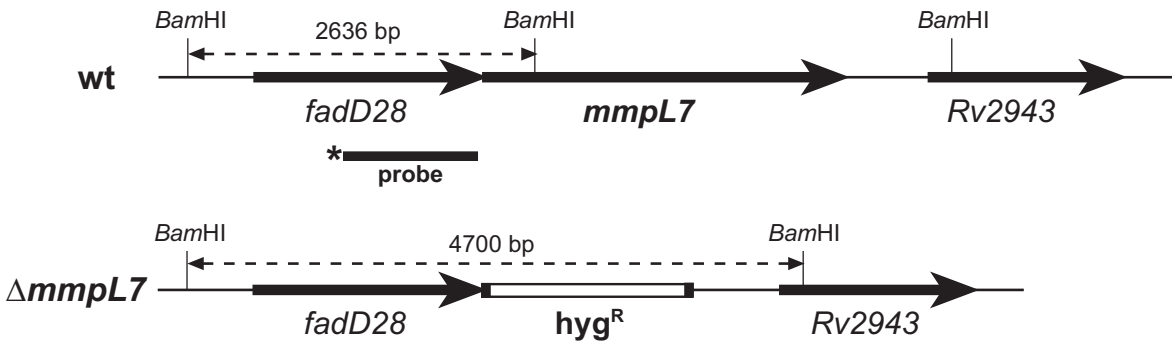

B

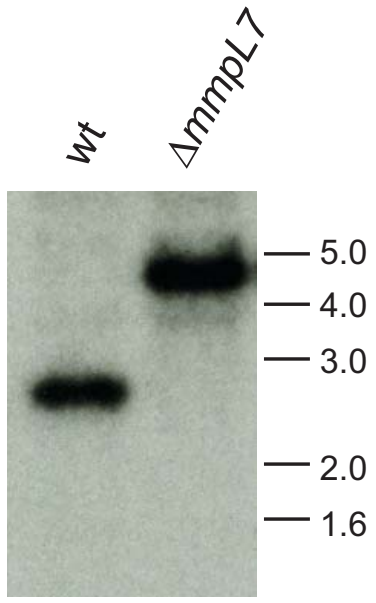

C

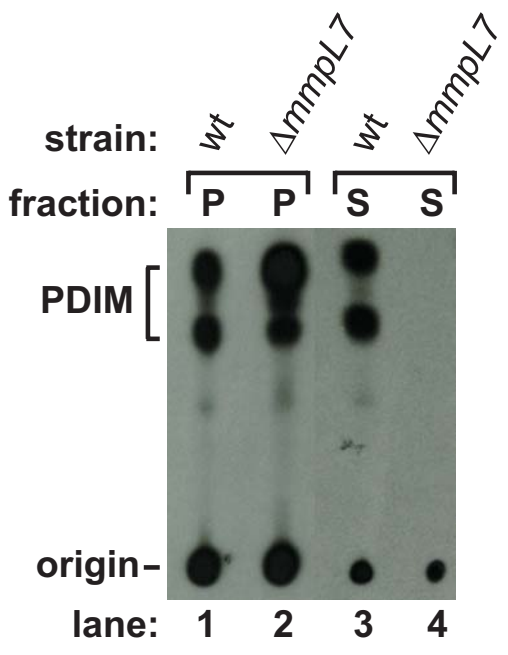

Figure S1
